# Supplementary material for: Identification and evolution of glucosinolate sulfatases in a specialist flea beetle
Source: PubMed Central journal article supplement (PMC6823443; doi:10.1038/s41598-019-51749-x), 2019-10-31
Supplement: 41598_2019_51749_MOESM1_ESM.pdf [file 41598_2019_51749_MOESM1_ESM.pdf]

## **Supplementary Information**

### **Identification and evolution of glucosinolate sulfatases in a specialist flea beetle**

Seung-Joon Ahn, Franziska Betzin, Matilda W. Gikonyo, Zhi-Ling Yang, Tobias G. Köllner, Franziska Beran\*

\*Correspondence: Franziska Beran: [fberan@ice.mpg.de](mailto:fberan@ice.mpg.de)

**Supplementary Figures and Tables**

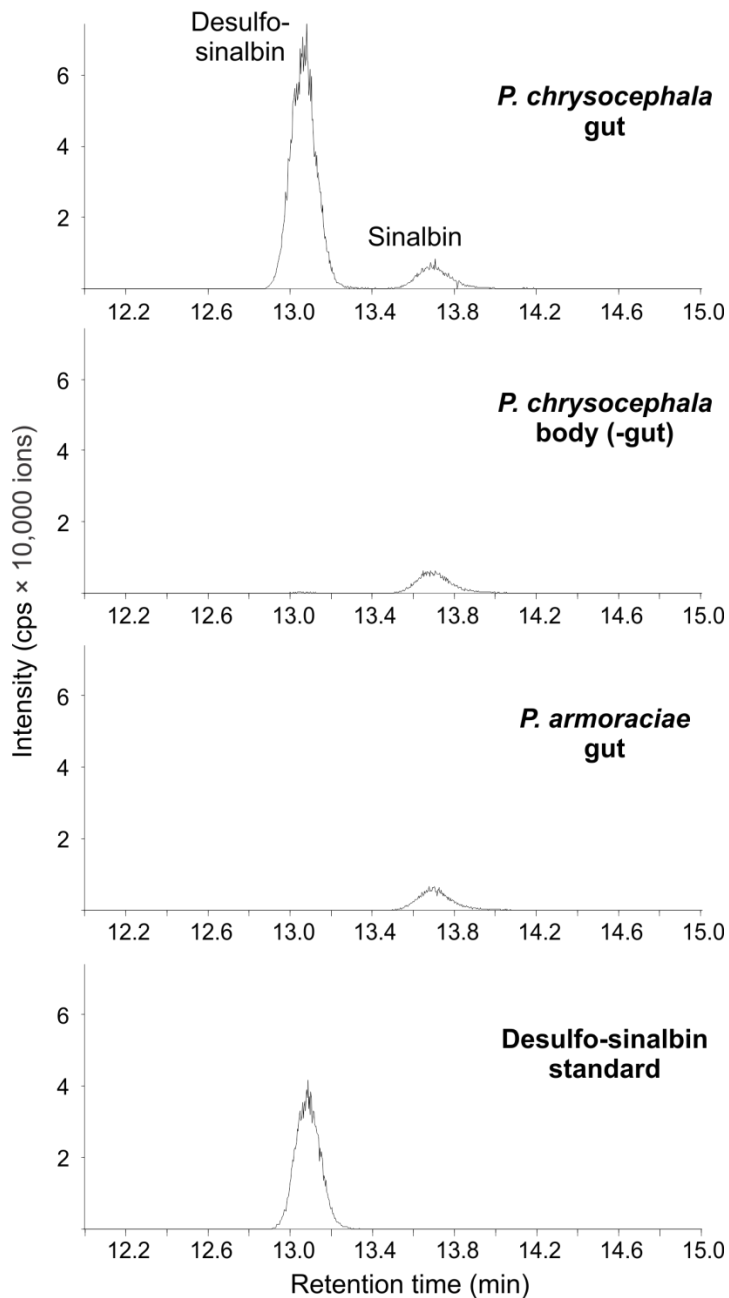

**Supplementary Figure S1. Glucosinolate sulfatase activity in *Psylliodes chrysocephala* and *Phyllotreta armoraciae*.** Crude protein extracts from the gut and the remaining body tissues were incubated with eight different glucosinolates. The extracted LC-MS/MS ion chromatogram of desulfo-sinalbin is shown. Remaining intact sinalbin in the assay is detected as desulfo-sinalbin due to in-source fragmentation in positive ionization mode.



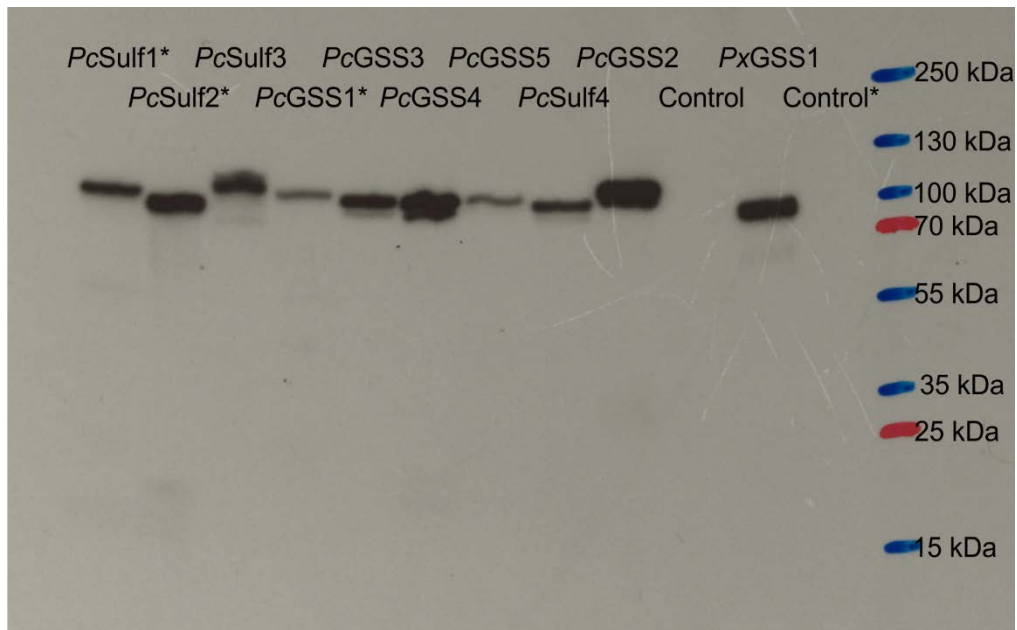

**Supplementary Figure S3. Detection of recombinant *PcSulfs*, *PcGSSs*, and *PxGSS1* by Western blotting.** Proteins were heterologously expressed in *Sf9* insect cells. Protein samples marked with an asterisk were concentrated by trichloroacetic acid (TCA) precipitation.

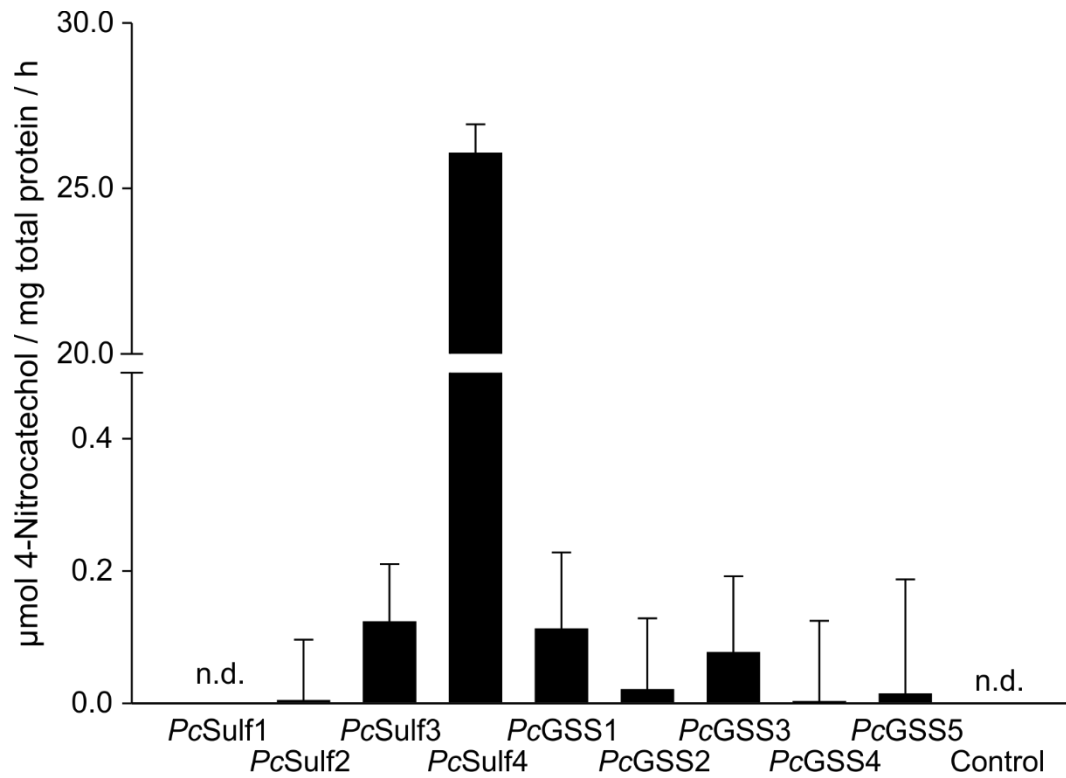

**Supplementary Figure S4. Activity of recombinant sulfatases towards the general substrate 4-nitrocatechol sulfate.** Proteins were heterologously expressed in *Sf9* insect cells and non-transfected *Sf9* cells served as a control. n.d., not detected. Means+SD of n=3 technical replicates.

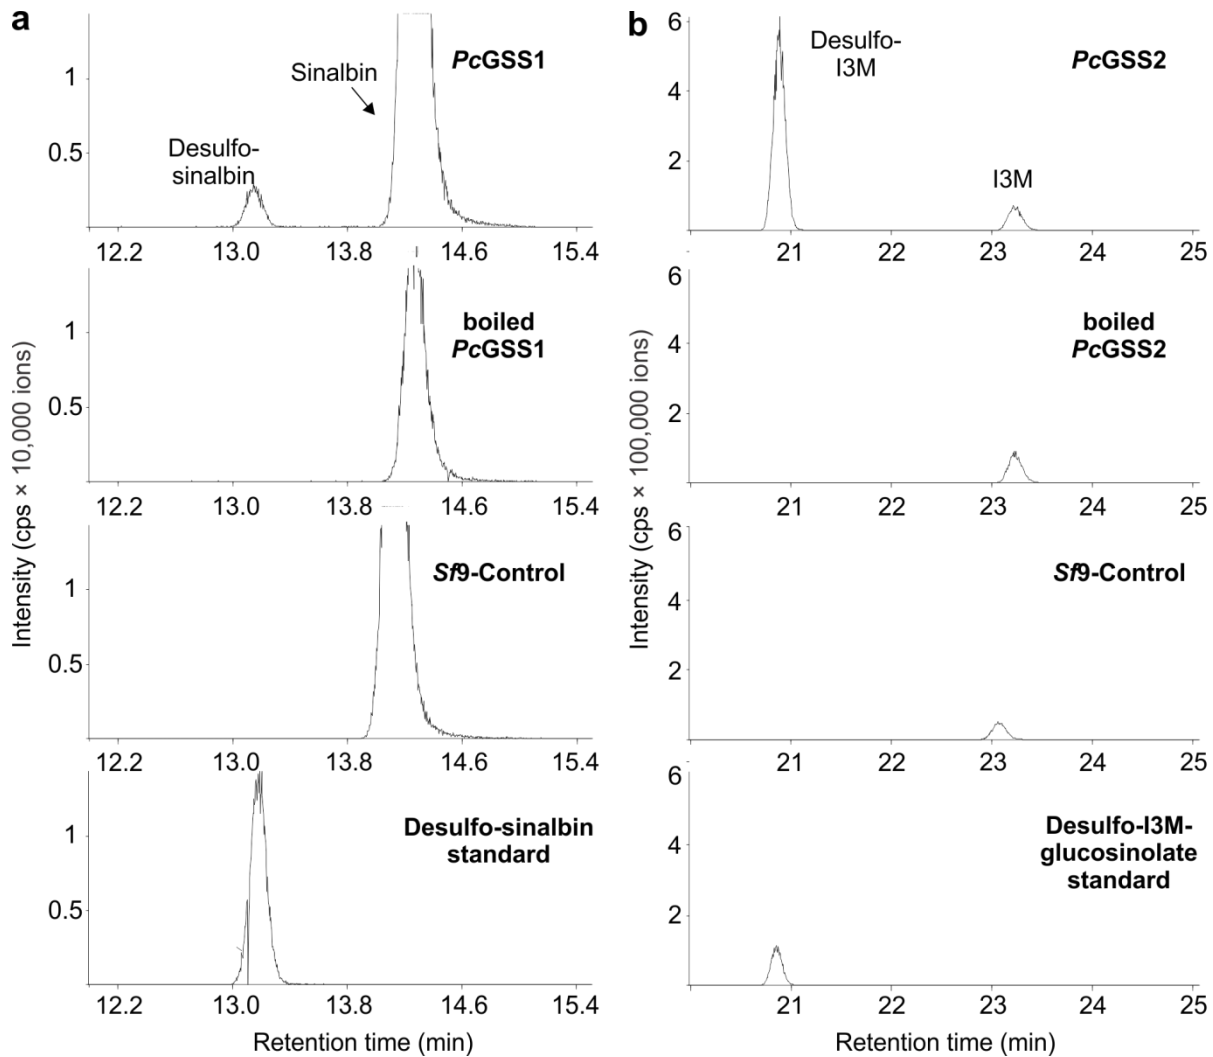

**Supplementary Figure S5. LC-MS/MS analyses of glucosinolate sulfatase activity assays using *Sf9*-expressed *PcGSS1* (a) and *PcGSS2* (b).** Heterologously expressed enzymes were incubated with a mixture of eight glucosinolates. Extracted LC-MS/MS ion chromatograms of desulfo-sinalbin (a) and desulfo-indol-3-ylmethyl glucosinolate (desulfo-I3M glucosinolate) (b) are shown. Remaining intact glucosinolate in the assay was detected as desulfo-glucosinolate due to in-source fragmentation in positive ionization mode.

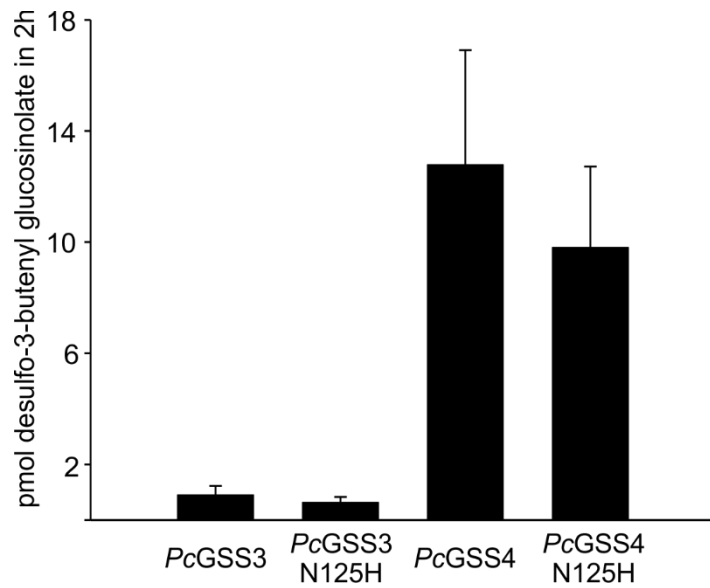

**Supplementary Figure S6. Mutation of the asparagine residue at position 125 does not affect glucosinolate sulfatase (GSS) activity of *PcGSS3* and *PcGSS4* towards the substrate 3-butenyl glucosinolate.** *PcGSS3*, *PcGSS3* N125H, *PcGSS4*, and *PcGSS4* N125H were heterologously expressed in High Five™ insect cells and incubated with eight different glucosinolate substrates for 2 h at 35°C. Means+SD of n=3 technical replicates.

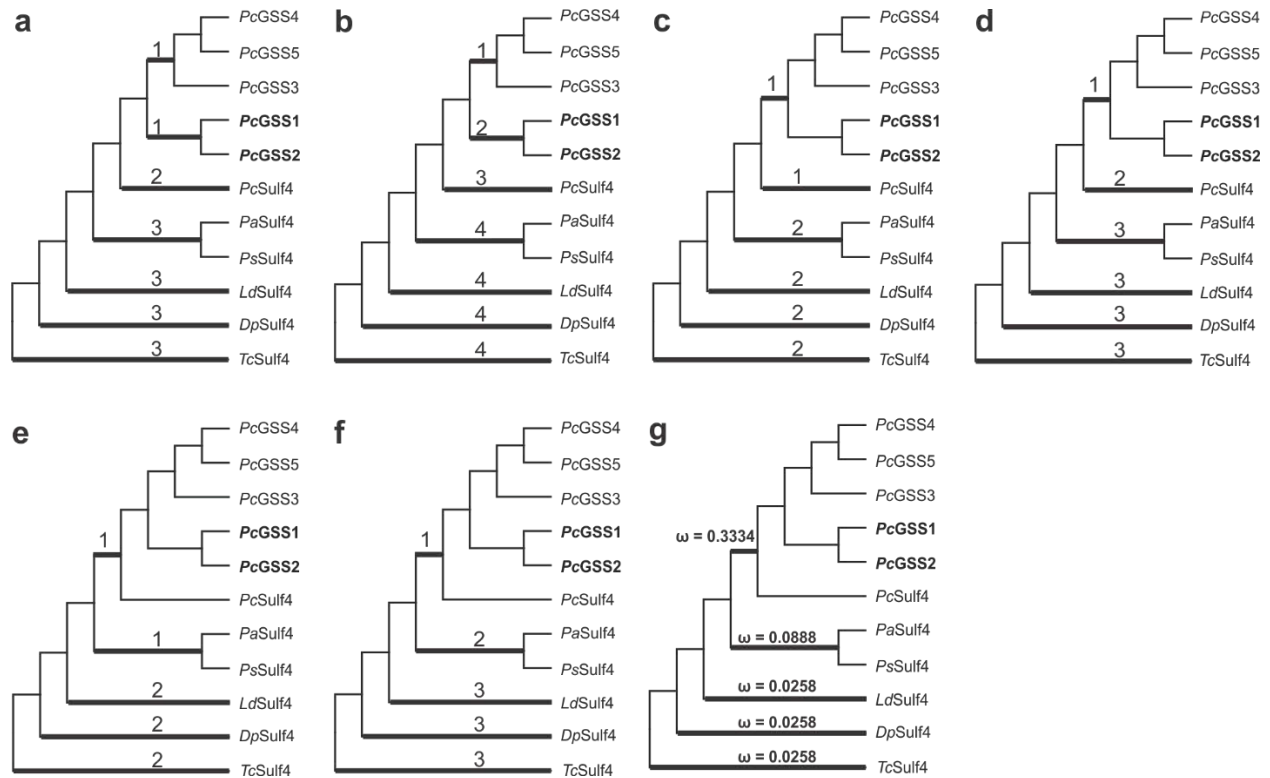

**Supplementary Figure S7. Analysis of selection pressures acting on *PcGSS* and *PcSulf4* genes and other members of the coleopteran *Sulf4* clade.** The Maximum-Likelihood tree of coleopteran *Sulf4* and GSS enzymes was constructed using MEGA 7.0.14, rooted with *TcSulf4*. The two major active GSS are shown in bold. Panels (a) to (f) show the series of models that were used to determine whether different selection pressures act on the two *PcGSS* subclades (a and b), on the entire *PcGSS* clade and the ancestral *PcSulf4* gene (c and d), and on the *PcGSS/PcSulf4* clade, the *PaSulf4/PsSulf4* clade, and other coleopteran *Sulf4* genes (e and f). The  $\omega$  ratios calculated with the final three-ratio model are shown on the same tree in (g). All clades are under purifying selection. *Pc*, *Psylliodes chrysocephala*; *Pa*, *Phyllotreta armoraciae*; *Ps*, *Phyllotreta striolata*; *Dp*, *Dendroctonus ponderosae*; *Ld*, *Leptinotarsa decemlineata*; *Tc*, *Tribolium castaneum*.



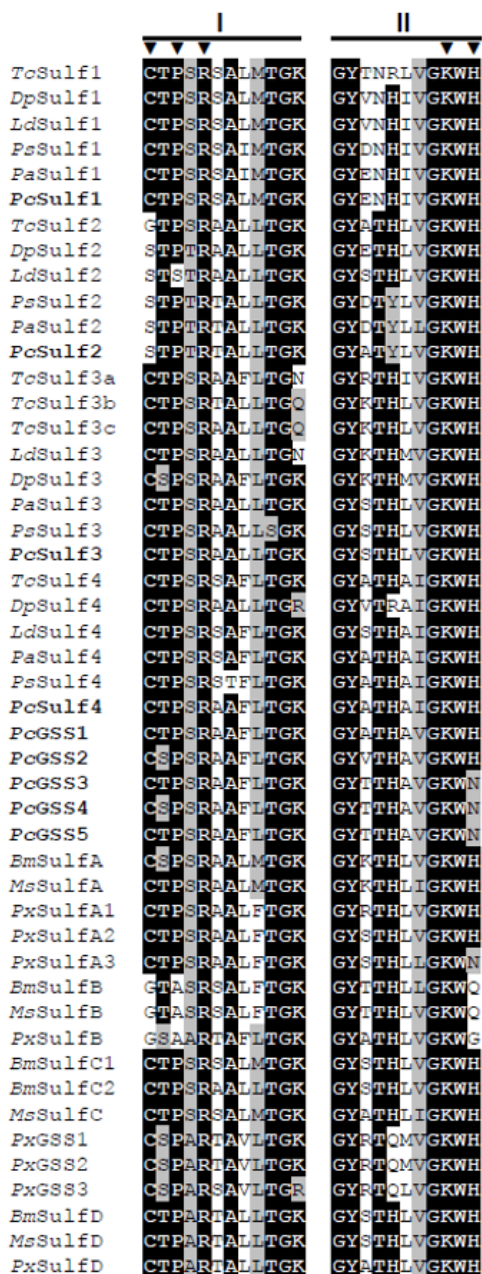

**Supplementary Figure S8. Alignment of signature sequences I and II from coleopteran and lepidopteran arylsulfatase-like enzymes (Sulfs) and glucosinolate sulfatases (GSS).** Catalytically active residues are marked with ▼. The threshold for similarity (grey)/identity (black) shading was set to 80%. Coleoptera: *Pc*, *Psylliodes chrysocephala*; *Pa*, *Phyllotreta armoraciae*; *Ps*, *Phyllotreta striolata*; *Dp*, *Dendroctonus ponderosae*; *Ld*, *Leptinotarsa decemlineata*; *Tc*, *Tribolium castaneum*; Lepidoptera: *Bm*, *Bombyx mori*; *Ms*, *Manduca sexta*; *Px*, *Plutella xylostella*.

**Supplementary Table S1. Comparison of *PcSulf* and *PcGSS* gene expression in the gut and the rest body of *Psylliodes chrysocephala* by paired *t*-test.**

| Gene           | Newly emerged adults (n=4) |                 | 7 day-old adults fed on <i>Sinapis alba</i> (n=5) |                 | 7 day-old adults fed on <i>Brassica rapa</i> (n=4) |                 |
|----------------|----------------------------|-----------------|---------------------------------------------------|-----------------|----------------------------------------------------|-----------------|
| <i>PcSulf1</i> | <i>t</i> =1.346            | <i>P</i> =0.271 | <i>t</i> =-0.227                                  | <i>P</i> =0.832 | <i>t</i> =-6.824                                   | <i>P</i> =0.006 |
| <i>PcSulf2</i> | <i>t</i> =-5.098           | <i>P</i> =0.015 | <i>t</i> =-34.550                                 | <i>P</i> <0.001 | <i>t</i> =-19.129                                  | <i>P</i> <0.001 |
| <i>PcSulf3</i> | <i>t</i> =-8.736           | <i>P</i> =0.003 | <i>t</i> =-54.822                                 | <i>P</i> <0.001 | <i>t</i> =-11.728                                  | <i>P</i> =0.001 |
| <i>PcSulf4</i> | <i>t</i> =-10.722          | <i>P</i> =0.002 | <i>t</i> =-9.245                                  | <i>P</i> <0.001 | <i>t</i> =-57.978                                  | <i>P</i> <0.001 |
| <i>PcGSS1</i>  | <i>t</i> =18.188           | <i>P</i> <0.001 | <i>t</i> =6.643                                   | <i>P</i> =0.003 | <i>t</i> =2.666                                    | <i>P</i> =0.076 |
| <i>PcGSS2</i>  | <i>t</i> =2.444            | <i>P</i> =0.092 | <i>t</i> =2.569                                   | <i>P</i> =0.062 | <i>t</i> =3.554                                    | <i>P</i> =0.038 |
| <i>PcGSS4</i>  | <i>t</i> =11.017           | <i>P</i> =0.002 | <i>t</i> =14.360                                  | <i>P</i> <0.001 | <i>t</i> =-4.991                                   | <i>P</i> =0.015 |
| <i>PcGSS5</i>  | <i>t</i> =12.013           | <i>P</i> =0.001 | <i>t</i> =11.033                                  | <i>P</i> <0.001 | <i>t</i> =5.446                                    | <i>P</i> =0.012 |

**Supplementary Table S2. Comparison of *PcGSS* gene expression in newly emerged adults and after feeding for seven days on *Sinapis alba* and *Brassica rapa*, respectively.**

| Gene          | Method              | Statistics      | <i>P</i> value  |
|---------------|---------------------|-----------------|-----------------|
| <i>PcGSS1</i> | Kruskal-Wallis test | <i>H</i> =8.523 | <i>P</i> =0.005 |
| <i>PcGSS2</i> | Kruskal-Wallis test | <i>H</i> =2.443 | <i>P</i> =0.319 |
| <i>PcGSS4</i> | ANOVA               | <i>F</i> =4.145 | <i>P</i> =0.046 |
| <i>PcGSS5</i> | ANOVA               | <i>F</i> =1.143 | <i>P</i> =0.354 |

**Supplementary Table S3. Comparison of *PcGSS* gene expression and GSS activity in gut tissue of adult *Psylliodes chrysocephala* injected with dsRNA targeting *PcGSS1*, *PcGSS2*, and *IMPI*, respectively.**

| Gene                         | Transformation             | Method              | Statistics       | <i>P</i> value  |
|------------------------------|----------------------------|---------------------|------------------|-----------------|
| <i>PcGSS1</i>                | Log <sub>10</sub>          | ANOVA               | <i>F</i> =75.988 | <i>P</i> <0.001 |
| <i>PcGSS2</i>                | -                          | Kruskal-Wallis test | <i>H</i> =9.231  | <i>P</i> =0.01  |
| <i>PcGSS4</i>                | -                          | ANOVA               | <i>F</i> =12.662 | <i>P</i> <0.001 |
| <i>PcGSS5</i>                | -                          | ANOVA               | <i>F</i> =58.117 | <i>P</i> <0.001 |
| <b>Desulfo-glucosinolate</b> |                            |                     |                  |                 |
| desulfo-3But                 | -                          | Kruskal-Wallis test | <i>H</i> =1.801  | <i>P</i> =0.406 |
| desulfo-4MSOB                | Log <sub>10</sub> (x+0.01) | ANOVA               | <i>F</i> =5.065  | <i>P</i> =0.014 |
| desulfo-4MTB                 | Log <sub>10</sub> (x+0.01) | ANOVA               | <i>F</i> =2.486  | <i>P</i> =0.102 |
| desulfo-I3M                  | Log <sub>10</sub>          | ANOVA               | <i>F</i> =10.552 | <i>P</i> <0.001 |
| desulfo-2PE                  | -                          | Kruskal-Wallis test | <i>H</i> =0.113  | <i>P</i> =0.954 |
| desulfo-Benzyl               | Log <sub>10</sub>          | ANOVA               | <i>F</i> =12.514 | <i>P</i> <0.001 |
| desulfo-Sinalbin             | Log <sub>10</sub>          | ANOVA               | <i>F</i> =21.001 | <i>P</i> <0.001 |

3But, 3-butenyl; 4MSOB, 4-methylsulfanylbutyl; 4MTB, 4-methylthiobutyl; I3M, indol-3-ylmethyl; 2PE, 2-phenylethyl

**Supplementary Table S4. LC-MS/MS parameters for multiple reaction monitoring (MRM) of desulfo-glucosinolates and sinalbin.**

| Compound         | Q1 [ <i>m/z</i> ] | Q3 [ <i>m/z</i> ] | DP (V) | EP (V) | CE (V) | CXP (V) |
|------------------|-------------------|-------------------|--------|--------|--------|---------|
| desulfo-2OH3But  | 310.0             | 148.0             | 30     | 5      | 15     | 5       |
| desulfo-3But     | 294.0             | 132.0             | 30     | 5      | 15     | 5       |
| desulfo-4MSOB    | 358.0             | 196.0             | 30     | 5      | 15     | 5       |
| desulfo-4MTB     | 342.0             | 180.0             | 30     | 5      | 15     | 5       |
| desulfo-I3M      | 369.0             | 207.0             | 30     | 5      | 15     | 5       |
| desulfo-2PE      | 344.1             | 182.1             | 30     | 5      | 15     | 5       |
| desulfo-Benzyl   | 330.0             | 168.0             | 30     | 5      | 15     | 5       |
| desulfo-Sinalbin | 346.0             | 184.0             | 30     | 5      | 15     | 5       |
| Sinalbin         | 424.0             | 95.9              | -65    | -5     | -60    | 0       |

2OH3But, 2-hydroxy-3-butenyl; 3But, 3-butenyl; 4MSOB, 4-methylsulfinylbutyl; 4MTB, 4-methylthiobutyl; I3M, indol-3-ylmethyl; 2PE, 2-phenylethyl
